# Supplementary material for: Prevalence and 11-year incidence of common eye diseases and their relation to health-related quality of life, mental health, and visual impairment
Source: Springer Nature journal article supplement (doi:10.1007/s11136-021-02817-1), 2021-03-23
Supplement: MOESM1 [file 18997140]

**Prevalence and 11-year incidence of common eye diseases and their relation to health-related quality of life, mental health, and visual impairment**

Quality of Life Research

Petri K M Purola, Janika E Nättinen, Matti U I Ojamo, Seppo V P Koskinen, Harri A Rissanen, Päivi R J Sainio, and Hannu M T Uusitalo

Corresponding author:

Petri K M Purola

Department of Ophthalmology, Faculty of Medicine and Health Technology, Arvo building, 33014  
Tampere University, Finland

E-mail: [petri.purola@tuni.fi](mailto:petri.purola@tuni.fi)

**Online Resource 1** Multivariable linear regression analysis examining the changes in EQ-5D and 15D index values, and GHQ-12 total scores between 2000 and 2011

|                                                  | Change in EQ-5D<br>(n = 1955) |                      | Change in 15D<br>(n = 2158) |                      | Change in GHQ-12<br>(n = 2302) |                      |
|--------------------------------------------------|-------------------------------|----------------------|-----------------------------|----------------------|--------------------------------|----------------------|
|                                                  | B<br>coefficients             | Beta<br>coefficients | B<br>coefficients           | Beta<br>coefficients | B<br>coefficients              | Beta<br>coefficients |
| Constant                                         | 0.456 ***                     |                      | 0.384 ***                   |                      | 1.659 ***                      |                      |
| Age at the baseline                              | -0.0003                       | -0.020               | -0.0005 ***                 | -0.077 ***           | -0.025 ***                     | -0.081 ***           |
| Male gender                                      | 0.001                         | 0.003                | -0.004                      | -0.033               | -0.103                         | -0.017               |
| Incident glaucoma                                | 0.020                         | 0.015                | 0.001                       | 0.002                | 0.102                          | 0.004                |
| Incident cataract,<br>unoperated                 | -0.010                        | -0.012               | -0.014 *                    | -0.046 *             | 0.258                          | 0.016                |
| Incident RD                                      | -0.057                        | -0.037               | <b>-0.020</b>               | -0.036               | 0.452                          | 0.016                |
| Incident heart disease                           | -0.034 **                     | -0.063 **            | <b>-0.017 ***</b>           | -0.083 ***           | 0.586 ***                      | 0.057 ***            |
| Incident pulmonary disease                       | -0.035 *                      | -0.051 *             | <b>-0.020 ***</b>           | -0.078 ***           | 0.289                          | 0.023                |
| Incident vascular disease                        | -0.023                        | -0.032               | <b>-0.017 **</b>            | -0.062 **            | 0.528 *                        | 0.038 *              |
| Incident musculoskeletal<br>condition            | -0.051 ***                    | -0.141 ***           | -0.009 ***                  | -0.068 ***           | 0.345 **                       | 0.051 **             |
| Incident hypertension                            | -0.035 ***                    | -0.083 ***           | -0.008 *                    | -0.047 *             | 0.508 ***                      | 0.063 ***            |
| Incident diabetes                                | -0.029                        | -0.038               | <b>-0.021 ***</b>           | -0.072 ***           | 0.692 **                       | 0.048 **             |
| Incident psychiatric<br>disorder                 | <b>-0.091 ***</b>             | -0.121 ***           | <b>-0.040 ***</b>           | -0.139 ***           | 2.141 ***                      | 0.149 ***            |
| Incident cancer                                  | 0.024                         | 0.030                | -0.001                      | -0.004               | -0.189                         | -0.012               |
| QoL index value / total<br>score at the baseline | <b>-0.491 ***</b>             | -0.444 ***           | <b>-0.381 ***</b>           | -0.383 ***           | -0.738 ***                     | -0.649 ***           |
| $R^2$                                            | 0.222 ***                     | 0.222 ***            | 0.176 ***                   | 0.176 ***            | 0.430 ***                      | 0.430 ***            |
| Adjusted $R^2$                                   | 0.216 ***                     | 0.216 ***            | 0.171 ***                   | 0.171 ***            | 0.426 ***                      | 0.426 ***            |

The unstandardized B coefficients show the magnitude of the impact on health-related quality of life and psychological distress, while the standardized Beta coefficients allow the comparison of the explanatory variables with each other. Clinically meaningful B coefficients are bolded ( $\geq 0.07$  for EQ-5D and  $\geq 0.015$  for 15D). QoL quality of life, RD retinal degeneration

\*Denotes statistical significance with  $p < 0.05$

\*\*Denotes statistical significance with  $p < 0.01$

\*\*\*Denotes statistical significance with  $p < 0.0001$
